## CORRECTION

# Correction: Physical activity and mental health experiences of people living with long term conditions during COVID-19 pandemic: A qualitative study

Leire Ambrosio, Jacqui Morris, Danielle Lambrick, James Faulkner, Eric Compton, Mari Carmen Portillo

## Notice of republication

This article was republished on March 14<sup>th</sup>, 2024, to correct the author list and add Danielle Lambrick and James Faulkner as the third and fourth authors respectively. Please download this article again to view the correct version. The originally published, uncorrected article and the republished, corrected articles are provided here for reference.

## Supporting information

**S1 File. Originally published, uncorrected article.**  
(PDF)

**S2 File. Republished, corrected article.**  
(PDF)

## Reference

1. Ambrosio L, Morris J, Lambrick D, Faulkner J, Compton E, Portillo MC (2023) Physical activity and mental health experiences of people living with long term conditions during COVID-19 pandemic: A qualitative study. PLoS ONE 18(7): e0285785. <https://doi.org/10.1371/journal.pone.0285785> PMID: [37428782](https://pubmed.ncbi.nlm.nih.gov/37428782/)

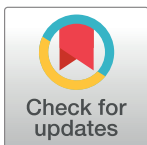

## OPEN ACCESS

**Citation:** Ambrosio L, Morris J, Lambrick D, Faulkner J, Compton E, Portillo MC (2024) Correction: Physical activity and mental health experiences of people living with long term conditions during COVID-19 pandemic: A qualitative study. PLoS ONE 19(3): e0301302. <https://doi.org/10.1371/journal.pone.0301302>

**Published:** March 22, 2024

**Copyright:** © 2024 Ambrosio et al. This is an open access article distributed under the terms of the [Creative Commons Attribution License](https://creativecommons.org/licenses/by/4.0/), which permits unrestricted use, distribution, and reproduction in any medium, provided the original author and source are credited.
